# Supplementary material for: Metabolomic profiles and health-promoting potential of Euchresta japonica tissues revealed by widely targeted metabolomics
Source: Front Plant Sci. 2025 May 1;16:1537273. doi: 10.3389/fpls.2025.1537273 (PMC12078262; doi:10.3389/fpls.2025.1537273)
Supplement: Supplementary file 5 [file DataSheet5.xlsx]

## Sheet: Sheet1
Table S5 The top 50 enriched diseases in key active ingredients against diseases in Euchresta japonica.
No.	Diseases	Number of Compounds	Related Compounds
1	Cancer, unspecific	196	“1,2,4-Trihydroxyanthraquinone; 1,7-Dihydroxyxanthone; 12-Hydroxyoctadec-9-Enoic Acid; Ricinoleic acid; 2'-Deoxyadenosine*; 3,5,6,7,8,3',4'-Heptamethoxyflavone; 3,5-Dihydroxy-7,4'-dimethoxyflavone; 3,7-Di-O-methylquercetin; 3'-Hydroxy-4'-O-methylglabridin; 3-Hydroxyurs-12-en-28-oic acid (Ursolic acid); 3'-Methoxydaidzein; 3'-Methoxypuerarin; 3-Methylkaempferol; 3'-O-methylorobol; 4,4'-Dihydroxy-2…
2	Alzheimer's Disease	173	“1,2,4-Trihydroxyanthraquinone; 1,7-Dihydroxyxanthone; 12-Hydroxyoctadec-9-Enoic Acid; Ricinoleic acid; 2'-Deoxyadenosine*; 3,5,6,7,8,3',4'-Heptamethoxyflavone; 3,5-Dihydroxy-7,4'-dimethoxyflavone; 3,7-Di-O-methylquercetin; 3'-Hydroxy-4'-O-methylglabridin; 3-Hydroxyurs-12-en-28-oic acid (Ursolic acid); 3'-Methoxydaidzein; 3-Methylkaempferol; 3'-O-methylorobol; 4,4'-Dihydroxy-2-methoxychalcone; Ec…
3	Analgesics	173	“1,2,4-Trihydroxyanthraquinone; 1,7-Dihydroxyxanthone; 12-Hydroxyoctadec-9-Enoic Acid; Ricinoleic acid; 2'-Deoxyadenosine*; 3,5,6,7,8,3',4'-Heptamethoxyflavone; 3,5-Dihydroxy-7,4'-dimethoxyflavone; 3,7-Di-O-methylquercetin; 3'-Hydroxy-4'-O-methylglabridin; 3-Hydroxyurs-12-en-28-oic acid (Ursolic acid); 3'-Methoxydaidzein; 3-Methylkaempferol; 3'-O-methylorobol; 4,4'-Dihydroxy-2-methoxychalcone; Ec…
4	Breast cancer	171	“1,2,4-Trihydroxyanthraquinone; 1,7-Dihydroxyxanthone; 12-Hydroxyoctadec-9-Enoic Acid; Ricinoleic acid; 2'-Deoxyadenosine*; 3,5,6,7,8,3',4'-Heptamethoxyflavone; 3,5-Dihydroxy-7,4'-dimethoxyflavone; 3,7-Di-O-methylquercetin; 3'-Hydroxy-4'-O-methylglabridin; 3-Hydroxyurs-12-en-28-oic acid (Ursolic acid); 3'-Methoxydaidzein; 3-Methylkaempferol; 3'-O-methylorobol; 4,4'-Dihydroxy-2-methoxychalcone; Ec…
5	Pain, unspecified	171	“1,2,4-Trihydroxyanthraquinone; 1,7-Dihydroxyxanthone; 12-Hydroxyoctadec-9-Enoic Acid; Ricinoleic acid; 2'-Deoxyadenosine*; 3,5,6,7,8,3',4'-Heptamethoxyflavone; 3,5-Dihydroxy-7,4'-dimethoxyflavone; 3,7-Di-O-methylquercetin; 3'-Hydroxy-4'-O-methylglabridin; 3-Hydroxyurs-12-en-28-oic acid (Ursolic acid); 3'-Methoxydaidzein; 3-Methylkaempferol; 3'-O-methylorobol; 4,4'-Dihydroxy-2-methoxychalcone; Ec…
6	Prostate cancer	171	“1,2,4-Trihydroxyanthraquinone; 1,7-Dihydroxyxanthone; 12-Hydroxyoctadec-9-Enoic Acid; Ricinoleic acid; 2'-Deoxyadenosine*; 3,5,6,7,8,3',4'-Heptamethoxyflavone; 3,5-Dihydroxy-7,4'-dimethoxyflavone; 3,7-Di-O-methylquercetin; 3'-Hydroxy-4'-O-methylglabridin; 3-Hydroxyurs-12-en-28-oic acid (Ursolic acid); 3'-Methoxydaidzein; 3'-Methoxypuerarin; 3-Methylkaempferol; 3'-O-methylorobol; 4,4'-Dihydroxy-2…
7	Rheumatoid arthritis, unspecified	171	“1,2,4-Trihydroxyanthraquinone; 1,7-Dihydroxyxanthone; 12-Hydroxyoctadec-9-Enoic Acid; Ricinoleic acid; 2'-Deoxyadenosine*; 3,5,6,7,8,3',4'-Heptamethoxyflavone; 3,5-Dihydroxy-7,4'-dimethoxyflavone; 3,7-Di-O-methylquercetin; 3'-Hydroxy-4'-O-methylglabridin; 3-Hydroxyurs-12-en-28-oic acid (Ursolic acid); 3'-Methoxydaidzein; 3-Methylkaempferol; 3'-O-methylorobol; 4,4'-Dihydroxy-2-methoxychalcone; Ec…
8	Lung Cancer	170	“1,2,4-Trihydroxyanthraquinone; 1,7-Dihydroxyxanthone; 12-Hydroxyoctadec-9-Enoic Acid; Ricinoleic acid; 2'-Deoxyadenosine*; 3,5,6,7,8,3',4'-Heptamethoxyflavone; 3,5-Dihydroxy-7,4'-dimethoxyflavone; 3,7-Di-O-methylquercetin; 3'-Hydroxy-4'-O-methylglabridin; 3-Hydroxyurs-12-en-28-oic acid (Ursolic acid); 3'-Methoxydaidzein; 3-Methylkaempferol; 3'-O-methylorobol; 4,4'-Dihydroxy-2-methoxychalcone; Ec…
9	Myocardial Infarction	170	“1,2,4-Trihydroxyanthraquinone; 1,7-Dihydroxyxanthone; 12-Hydroxyoctadec-9-Enoic Acid; Ricinoleic acid; 2'-Deoxyadenosine*; 3,5,6,7,8,3',4'-Heptamethoxyflavone; 3,5-Dihydroxy-7,4'-dimethoxyflavone; 3,7-Di-O-methylquercetin; 3'-Hydroxy-4'-O-methylglabridin; 3-Hydroxyurs-12-en-28-oic acid (Ursolic acid); 3'-Methoxydaidzein; 3-Methylkaempferol; 3'-O-methylorobol; 4,4'-Dihydroxy-2-methoxychalcone; Ec…
10	Arthritis	169	“1,2,4-Trihydroxyanthraquinone; 1,7-Dihydroxyxanthone; 12-Hydroxyoctadec-9-Enoic Acid; Ricinoleic acid; 2'-Deoxyadenosine*; 3,5,6,7,8,3',4'-Heptamethoxyflavone; 3,5-Dihydroxy-7,4'-dimethoxyflavone; 3,7-Di-O-methylquercetin; 3'-Hydroxy-4'-O-methylglabridin; 3-Hydroxyurs-12-en-28-oic acid (Ursolic acid); 3'-Methoxydaidzein; 3-Methylkaempferol; 3'-O-methylorobol; 4,4'-Dihydroxy-2-methoxychalcone; Ec…
11	Inflammation	169	“1,2,4-Trihydroxyanthraquinone; 1,7-Dihydroxyxanthone; 12-Hydroxyoctadec-9-Enoic Acid; Ricinoleic acid; 2'-Deoxyadenosine*; 3,5,6,7,8,3',4'-Heptamethoxyflavone; 3,5-Dihydroxy-7,4'-dimethoxyflavone; 3,7-Di-O-methylquercetin; 3'-Hydroxy-4'-O-methylglabridin; 3-Hydroxyurs-12-en-28-oic acid (Ursolic acid); 3'-Methoxydaidzein; 3-Methylkaempferol; 3'-O-methylorobol; 4,4'-Dihydroxy-2-methoxychalcone; Ec…
12	Osteoarthritis	169	“1,2,4-Trihydroxyanthraquinone; 1,7-Dihydroxyxanthone; 12-Hydroxyoctadec-9-Enoic Acid; Ricinoleic acid; 2'-Deoxyadenosine*; 3,5,6,7,8,3',4'-Heptamethoxyflavone; 3,5-Dihydroxy-7,4'-dimethoxyflavone; 3,7-Di-O-methylquercetin; 3'-Hydroxy-4'-O-methylglabridin; 3-Hydroxyurs-12-en-28-oic acid (Ursolic acid); 3'-Methoxydaidzein; 3-Methylkaempferol; 3'-O-methylorobol; 4,4'-Dihydroxy-2-methoxychalcone; Ec…
13	Renal Cell Carcinoma	169	“1,2,4-Trihydroxyanthraquinone; 1,7-Dihydroxyxanthone; 12-Hydroxyoctadec-9-Enoic Acid; Ricinoleic acid; 2'-Deoxyadenosine*; 3,5,6,7,8,3',4'-Heptamethoxyflavone; 3,5-Dihydroxy-7,4'-dimethoxyflavone; 3,7-Di-O-methylquercetin; 3'-Hydroxy-4'-O-methylglabridin; 3-Hydroxyurs-12-en-28-oic acid (Ursolic acid); 3'-Methoxydaidzein; 3-Methylkaempferol; 3'-O-methylorobol; 4,4'-Dihydroxy-2-methoxychalcone; Ec…
14	Abdominal aortic aneurysm	168	“1,2,4-Trihydroxyanthraquinone; 1,7-Dihydroxyxanthone; 12-Hydroxyoctadec-9-Enoic Acid; Ricinoleic acid; 2'-Deoxyadenosine*; 3,5,6,7,8,3',4'-Heptamethoxyflavone; 3,5-Dihydroxy-7,4'-dimethoxyflavone; 3,7-Di-O-methylquercetin; 3'-Hydroxy-4'-O-methylglabridin; 3-Hydroxyurs-12-en-28-oic acid (Ursolic acid); 3'-Methoxydaidzein; 3-Methylkaempferol; 3'-O-methylorobol; 4,4'-Dihydroxy-2-methoxychalcone; Ec…
15	Adenomatous polyposis	168	“1,2,4-Trihydroxyanthraquinone; 1,7-Dihydroxyxanthone; 12-Hydroxyoctadec-9-Enoic Acid; Ricinoleic acid; 2'-Deoxyadenosine*; 3,5,6,7,8,3',4'-Heptamethoxyflavone; 3,5-Dihydroxy-7,4'-dimethoxyflavone; 3,7-Di-O-methylquercetin; 3'-Hydroxy-4'-O-methylglabridin; 3-Hydroxyurs-12-en-28-oic acid (Ursolic acid); 3'-Methoxydaidzein; 3-Methylkaempferol; 3'-O-methylorobol; 4,4'-Dihydroxy-2-methoxychalcone; Ec…
16	Bladder cancer	168	“1,2,4-Trihydroxyanthraquinone; 1,7-Dihydroxyxanthone; 12-Hydroxyoctadec-9-Enoic Acid; Ricinoleic acid; 2'-Deoxyadenosine*; 3,5,6,7,8,3',4'-Heptamethoxyflavone; 3,5-Dihydroxy-7,4'-dimethoxyflavone; 3,7-Di-O-methylquercetin; 3'-Hydroxy-4'-O-methylglabridin; 3-Hydroxyurs-12-en-28-oic acid (Ursolic acid); 3'-Methoxydaidzein; 3-Methylkaempferol; 3'-O-methylorobol; 4,4'-Dihydroxy-2-methoxychalcone; Ec…
17	Carcinoma in situ, unspecified	168	“1,2,4-Trihydroxyanthraquinone; 1,7-Dihydroxyxanthone; 12-Hydroxyoctadec-9-Enoic Acid; Ricinoleic acid; 2'-Deoxyadenosine*; 3,5,6,7,8,3',4'-Heptamethoxyflavone; 3,5-Dihydroxy-7,4'-dimethoxyflavone; 3,7-Di-O-methylquercetin; 3'-Hydroxy-4'-O-methylglabridin; 3-Hydroxyurs-12-en-28-oic acid (Ursolic acid); 3'-Methoxydaidzein; 3-Methylkaempferol; 3'-O-methylorobol; 4,4'-Dihydroxy-2-methoxychalcone; Ec…
18	Carpal tunnel syndrome	168	“1,2,4-Trihydroxyanthraquinone; 1,7-Dihydroxyxanthone; 12-Hydroxyoctadec-9-Enoic Acid; Ricinoleic acid; 2'-Deoxyadenosine*; 3,5,6,7,8,3',4'-Heptamethoxyflavone; 3,5-Dihydroxy-7,4'-dimethoxyflavone; 3,7-Di-O-methylquercetin; 3'-Hydroxy-4'-O-methylglabridin; 3-Hydroxyurs-12-en-28-oic acid (Ursolic acid); 3'-Methoxydaidzein; 3-Methylkaempferol; 3'-O-methylorobol; 4,4'-Dihydroxy-2-methoxychalcone; Ec…
19	Colorectal cancer	168	“1,2,4-Trihydroxyanthraquinone; 1,7-Dihydroxyxanthone; 12-Hydroxyoctadec-9-Enoic Acid; Ricinoleic acid; 2'-Deoxyadenosine*; 3,5,6,7,8,3',4'-Heptamethoxyflavone; 3,5-Dihydroxy-7,4'-dimethoxyflavone; 3,7-Di-O-methylquercetin; 3'-Hydroxy-4'-O-methylglabridin; 3-Hydroxyurs-12-en-28-oic acid (Ursolic acid); 3'-Methoxydaidzein; 3-Methylkaempferol; 3'-O-methylorobol; 4,4'-Dihydroxy-2-methoxychalcone; Ec…
20	Dysmenorrhea, unspecified	168	“1,2,4-Trihydroxyanthraquinone; 1,7-Dihydroxyxanthone; 12-Hydroxyoctadec-9-Enoic Acid; Ricinoleic acid; 2'-Deoxyadenosine*; 3,5,6,7,8,3',4'-Heptamethoxyflavone; 3,5-Dihydroxy-7,4'-dimethoxyflavone; 3,7-Di-O-methylquercetin; 3'-Hydroxy-4'-O-methylglabridin; 3-Hydroxyurs-12-en-28-oic acid (Ursolic acid); 3'-Methoxydaidzein; 3-Methylkaempferol; 3'-O-methylorobol; 4,4'-Dihydroxy-2-methoxychalcone; Ec…
21	Endometriosis	168	“1,2,4-Trihydroxyanthraquinone; 1,7-Dihydroxyxanthone; 12-Hydroxyoctadec-9-Enoic Acid; Ricinoleic acid; 2'-Deoxyadenosine*; 3,5,6,7,8,3',4'-Heptamethoxyflavone; 3,5-Dihydroxy-7,4'-dimethoxyflavone; 3,7-Di-O-methylquercetin; 3'-Hydroxy-4'-O-methylglabridin; 3-Hydroxyurs-12-en-28-oic acid (Ursolic acid); 3'-Methoxydaidzein; 3-Methylkaempferol; 3'-O-methylorobol; 4,4'-Dihydroxy-2-methoxychalcone; Ec…
22	Genitourinary tumors	168	“1,2,4-Trihydroxyanthraquinone; 1,7-Dihydroxyxanthone; 12-Hydroxyoctadec-9-Enoic Acid; Ricinoleic acid; 2'-Deoxyadenosine*; 3,5,6,7,8,3',4'-Heptamethoxyflavone; 3,5-Dihydroxy-7,4'-dimethoxyflavone; 3,7-Di-O-methylquercetin; 3'-Hydroxy-4'-O-methylglabridin; 3-Hydroxyurs-12-en-28-oic acid (Ursolic acid); 3'-Methoxydaidzein; 3-Methylkaempferol; 3'-O-methylorobol; 4,4'-Dihydroxy-2-methoxychalcone; Ec…
23	Gestational hypertension	168	“1,2,4-Trihydroxyanthraquinone; 1,7-Dihydroxyxanthone; 12-Hydroxyoctadec-9-Enoic Acid; Ricinoleic acid; 2'-Deoxyadenosine*; 3,5,6,7,8,3',4'-Heptamethoxyflavone; 3,5-Dihydroxy-7,4'-dimethoxyflavone; 3,7-Di-O-methylquercetin; 3'-Hydroxy-4'-O-methylglabridin; 3-Hydroxyurs-12-en-28-oic acid (Ursolic acid); 3'-Methoxydaidzein; 3-Methylkaempferol; 3'-O-methylorobol; 4,4'-Dihydroxy-2-methoxychalcone; Ec…
24	Inflammatory diseases	168	“1,2,4-Trihydroxyanthraquinone; 1,7-Dihydroxyxanthone; 12-Hydroxyoctadec-9-Enoic Acid; Ricinoleic acid; 2'-Deoxyadenosine*; 3,5,6,7,8,3',4'-Heptamethoxyflavone; 3,5-Dihydroxy-7,4'-dimethoxyflavone; 3,7-Di-O-methylquercetin; 3'-Hydroxy-4'-O-methylglabridin; 3-Hydroxyurs-12-en-28-oic acid (Ursolic acid); 3'-Methoxydaidzein; 3-Methylkaempferol; 3'-O-methylorobol; 4,4'-Dihydroxy-2-methoxychalcone; Ec…
25	Malignant mesothelioma	168	“1,2,4-Trihydroxyanthraquinone; 1,7-Dihydroxyxanthone; 12-Hydroxyoctadec-9-Enoic Acid; Ricinoleic acid; 2'-Deoxyadenosine*; 3,5,6,7,8,3',4'-Heptamethoxyflavone; 3,5-Dihydroxy-7,4'-dimethoxyflavone; 3,7-Di-O-methylquercetin; 3'-Hydroxy-4'-O-methylglabridin; 3-Hydroxyurs-12-en-28-oic acid (Ursolic acid); 3'-Methoxydaidzein; 3-Methylkaempferol; 3'-O-methylorobol; 4,4'-Dihydroxy-2-methoxychalcone; Ec…
26	Meningioma	168	“1,2,4-Trihydroxyanthraquinone; 1,7-Dihydroxyxanthone; 12-Hydroxyoctadec-9-Enoic Acid; Ricinoleic acid; 2'-Deoxyadenosine*; 3,5,6,7,8,3',4'-Heptamethoxyflavone; 3,5-Dihydroxy-7,4'-dimethoxyflavone; 3,7-Di-O-methylquercetin; 3'-Hydroxy-4'-O-methylglabridin; 3-Hydroxyurs-12-en-28-oic acid (Ursolic acid); 3'-Methoxydaidzein; 3-Methylkaempferol; 3'-O-methylorobol; 4,4'-Dihydroxy-2-methoxychalcone; Ec…
27	Oropharyngeal squamous cell carcinoma	168	“1,2,4-Trihydroxyanthraquinone; 1,7-Dihydroxyxanthone; 12-Hydroxyoctadec-9-Enoic Acid; Ricinoleic acid; 2'-Deoxyadenosine*; 3,5,6,7,8,3',4'-Heptamethoxyflavone; 3,5-Dihydroxy-7,4'-dimethoxyflavone; 3,7-Di-O-methylquercetin; 3'-Hydroxy-4'-O-methylglabridin; 3-Hydroxyurs-12-en-28-oic acid (Ursolic acid); 3'-Methoxydaidzein; 3-Methylkaempferol; 3'-O-methylorobol; 4,4'-Dihydroxy-2-methoxychalcone; Ec…
28	Pathological angiogenesis	168	“1,2,4-Trihydroxyanthraquinone; 1,7-Dihydroxyxanthone; 12-Hydroxyoctadec-9-Enoic Acid; Ricinoleic acid; 2'-Deoxyadenosine*; 3,5,6,7,8,3',4'-Heptamethoxyflavone; 3,5-Dihydroxy-7,4'-dimethoxyflavone; 3,7-Di-O-methylquercetin; 3'-Hydroxy-4'-O-methylglabridin; 3-Hydroxyurs-12-en-28-oic acid (Ursolic acid); 3'-Methoxydaidzein; 3-Methylkaempferol; 3'-O-methylorobol; 4,4'-Dihydroxy-2-methoxychalcone; Ec…
29	Peutz-Jeghers syndrome	168	“1,2,4-Trihydroxyanthraquinone; 1,7-Dihydroxyxanthone; 12-Hydroxyoctadec-9-Enoic Acid; Ricinoleic acid; 2'-Deoxyadenosine*; 3,5,6,7,8,3',4'-Heptamethoxyflavone; 3,5-Dihydroxy-7,4'-dimethoxyflavone; 3,7-Di-O-methylquercetin; 3'-Hydroxy-4'-O-methylglabridin; 3-Hydroxyurs-12-en-28-oic acid (Ursolic acid); 3'-Methoxydaidzein; 3-Methylkaempferol; 3'-O-methylorobol; 4,4'-Dihydroxy-2-methoxychalcone; Ec…
30	Pyresis	168	“1,2,4-Trihydroxyanthraquinone; 1,7-Dihydroxyxanthone; 12-Hydroxyoctadec-9-Enoic Acid; Ricinoleic acid; 2'-Deoxyadenosine*; 3,5,6,7,8,3',4'-Heptamethoxyflavone; 3,5-Dihydroxy-7,4'-dimethoxyflavone; 3,7-Di-O-methylquercetin; 3'-Hydroxy-4'-O-methylglabridin; 3-Hydroxyurs-12-en-28-oic acid (Ursolic acid); 3'-Methoxydaidzein; 3-Methylkaempferol; 3'-O-methylorobol; 4,4'-Dihydroxy-2-methoxychalcone; Ec…
31	Stroke	168	“1,2,4-Trihydroxyanthraquinone; 1,7-Dihydroxyxanthone; 12-Hydroxyoctadec-9-Enoic Acid; Ricinoleic acid; 2'-Deoxyadenosine*; 3,5,6,7,8,3',4'-Heptamethoxyflavone; 3,5-Dihydroxy-7,4'-dimethoxyflavone; 3,7-Di-O-methylquercetin; 3'-Hydroxy-4'-O-methylglabridin; 3-Hydroxyurs-12-en-28-oic acid (Ursolic acid); 3'-Methoxydaidzein; 3-Methylkaempferol; 3'-O-methylorobol; 4,4'-Dihydroxy-2-methoxychalcone; Ec…
32	Vascular lesion regression	168	“1,2,4-Trihydroxyanthraquinone; 1,7-Dihydroxyxanthone; 12-Hydroxyoctadec-9-Enoic Acid; Ricinoleic acid; 2'-Deoxyadenosine*; 3,5,6,7,8,3',4'-Heptamethoxyflavone; 3,5-Dihydroxy-7,4'-dimethoxyflavone; 3,7-Di-O-methylquercetin; 3'-Hydroxy-4'-O-methylglabridin; 3-Hydroxyurs-12-en-28-oic acid (Ursolic acid); 3'-Methoxydaidzein; 3-Methylkaempferol; 3'-O-methylorobol; 4,4'-Dihydroxy-2-methoxychalcone; Ec…
33	Cardiovascular disease, unspecified	150	“1,2,4-Trihydroxyanthraquinone; 1,7-Dihydroxyxanthone; 11-Octadecanoic acid(Vaccenic acid)*; 12-Hydroxyoctadec-9-Enoic Acid; Ricinoleic acid; 1-Linoleoylglycerol*; 2'-Deoxyadenosine*; 3,5,6,7,8,3',4'-Heptamethoxyflavone; 3,5-Dihydroxy-7,4'-dimethoxyflavone; 3,7-Di-O-methylquercetin; 3'-Hydroxy-4'-O-methylglabridin; 3-Hydroxyurs-12-en-28-oic acid (Ursolic acid); 3'-Methoxydaidzein; 3-Methylkaempfe…
34	Chronic inflammatory diseases	136	“1,2,4-Trihydroxyanthraquinone; 1,7-Dihydroxyxanthone; 11-Octadecanoic acid(Vaccenic acid)*; 12-Hydroxyoctadec-9-Enoic Acid; Ricinoleic acid; 1-Linoleoylglycerol*; 2'-Deoxyadenosine*; 3,5-Dihydroxy-7,4'-dimethoxyflavone; 3'-Hydroxy-4'-O-methylglabridin; 3-Hydroxyurs-12-en-28-oic acid (Ursolic acid); 3'-Methoxydaidzein; 3-Methylkaempferol; 3'-O-methylorobol; 4,4'-Dihydroxy-2-methoxychalcone; Echin…
35	Non-small Cell Lung Cancer	121	“1,2,4-Trihydroxyanthraquinone; 1,7-Dihydroxyxanthone; 3,5,6,7,8,3',4'-Heptamethoxyflavone; 3,5-Dihydroxy-7,4'-dimethoxyflavone; 3,7-Di-O-methylquercetin; 3'-Hydroxy-4'-O-methylglabridin; 3-Hydroxyurs-12-en-28-oic acid (Ursolic acid); 3'-Methoxydaidzein; 3-Methylkaempferol; 3'-O-methylorobol; 4,4'-Dihydroxy-2-methoxychalcone; Echinatin; 5,4'-Dihydroxy-3,7-dimethoxyflavone(Kumatakenin)*; 5,4'-Dihy…
36	Solid tumors	121	“1,2,4-Trihydroxyanthraquinone; 1,7-Dihydroxyxanthone; 3,5,6,7,8,3',4'-Heptamethoxyflavone; 3,5-Dihydroxy-7,4'-dimethoxyflavone; 3,7-Di-O-methylquercetin; 3'-Hydroxy-4'-O-methylglabridin; 3'-Methoxydaidzein; 3-Methylkaempferol; 3'-O-methylorobol; 4,4'-Dihydroxy-2-methoxychalcone; Echinatin; 5,4'-Dihydroxy-3,7-dimethoxyflavone(Kumatakenin)*; 5,4'-Dihydroxy-7-methoxyflavanone (Sakuranetin); 5,7,2'-…
37	Multiple Myeloma	119	“1,2,4-Trihydroxyanthraquinone; 1,7-Dihydroxyxanthone; 3,5,6,7,8,3',4'-Heptamethoxyflavone; 3,5-Dihydroxy-7,4'-dimethoxyflavone; 3,7-Di-O-methylquercetin; 3'-Hydroxy-4'-O-methylglabridin; 3-Hydroxyurs-12-en-28-oic acid (Ursolic acid); 3'-Methoxydaidzein; 3-Methylkaempferol; 3'-O-methylorobol; 4,4'-Dihydroxy-2-methoxychalcone; Echinatin; 5,4'-Dihydroxy-3,7-dimethoxyflavone(Kumatakenin)*; 5,4'-Dihy…
38	Melanoma	114	“1,2,4-Trihydroxyanthraquinone; 1,7-Dihydroxyxanthone; 3,5,6,7,8,3',4'-Heptamethoxyflavone; 3,5-Dihydroxy-7,4'-dimethoxyflavone; 3,7-Di-O-methylquercetin; 3'-Hydroxy-4'-O-methylglabridin; 3-Hydroxyurs-12-en-28-oic acid (Ursolic acid); 3'-Methoxydaidzein; 3-Methylkaempferol; 3'-O-methylorobol; 4,4'-Dihydroxy-2-methoxychalcone; Echinatin; 5,4'-Dihydroxy-3,7-dimethoxyflavone(Kumatakenin)*; 5,4'-Dihy…
39	Ovarian cancer	112	“1,2,4-Trihydroxyanthraquinone; 1,7-Dihydroxyxanthone; 3,5,6,7,8,3',4'-Heptamethoxyflavone; 3,5-Dihydroxy-7,4'-dimethoxyflavone; 3,7-Di-O-methylquercetin; 3'-Hydroxy-4'-O-methylglabridin; 3-Hydroxyurs-12-en-28-oic acid (Ursolic acid); 3'-Methoxydaidzein; 3-Methylkaempferol; 3'-O-methylorobol; 4,4'-Dihydroxy-2-methoxychalcone; Echinatin; 5,4'-Dihydroxy-3,7-dimethoxyflavone(Kumatakenin)*; 5,4'-Dihy…
40	Chronic Myelogenous Leukemia (CML)	111	“1,2,4-Trihydroxyanthraquinone; 1,7-Dihydroxyxanthone; 3,5,6,7,8,3',4'-Heptamethoxyflavone; 3,5-Dihydroxy-7,4'-dimethoxyflavone; 3,7-Di-O-methylquercetin; 3'-Hydroxy-4'-O-methylglabridin; 3'-Methoxydaidzein; 3-Methylkaempferol; 3'-O-methylorobol; 4,4'-Dihydroxy-2-methoxychalcone; Echinatin; 5,4'-Dihydroxy-3,7-dimethoxyflavone(Kumatakenin)*; 5,4'-Dihydroxy-7-methoxyflavanone (Sakuranetin); 5,7,2'-…
41	Gastrointestinal Stromal Tumors (GIST)	111	“1,2,4-Trihydroxyanthraquinone; 1,7-Dihydroxyxanthone; 3,5,6,7,8,3',4'-Heptamethoxyflavone; 3,5-Dihydroxy-7,4'-dimethoxyflavone; 3,7-Di-O-methylquercetin; 3'-Hydroxy-4'-O-methylglabridin; 3'-Methoxydaidzein; 3-Methylkaempferol; 3'-O-methylorobol; 4,4'-Dihydroxy-2-methoxychalcone; Echinatin; 5,4'-Dihydroxy-3,7-dimethoxyflavone(Kumatakenin)*; 5,4'-Dihydroxy-7-methoxyflavanone (Sakuranetin); 5,7,2'-…
42	Hematological Malignancies	111	“1,2,4-Trihydroxyanthraquinone; 1,7-Dihydroxyxanthone; 3,5,6,7,8,3',4'-Heptamethoxyflavone; 3,5-Dihydroxy-7,4'-dimethoxyflavone; 3,7-Di-O-methylquercetin; 3'-Hydroxy-4'-O-methylglabridin; 3'-Methoxydaidzein; 3-Methylkaempferol; 3'-O-methylorobol; 4,4'-Dihydroxy-2-methoxychalcone; Echinatin; 5,4'-Dihydroxy-3,7-dimethoxyflavone(Kumatakenin)*; 5,4'-Dihydroxy-7-methoxyflavanone (Sakuranetin); 5,7,2'-…
43	HER2-positive Metastatic Breast Cancer	111	“1,2,4-Trihydroxyanthraquinone; 1,7-Dihydroxyxanthone; 3,5,6,7,8,3',4'-Heptamethoxyflavone; 3,5-Dihydroxy-7,4'-dimethoxyflavone; 3,7-Di-O-methylquercetin; 3'-Hydroxy-4'-O-methylglabridin; 3'-Methoxydaidzein; 3-Methylkaempferol; 3'-O-methylorobol; 4,4'-Dihydroxy-2-methoxychalcone; Echinatin; 5,4'-Dihydroxy-3,7-dimethoxyflavone(Kumatakenin)*; 5,4'-Dihydroxy-7-methoxyflavanone (Sakuranetin); 5,7,2'-…
44	Noninsulin-dependent diabetes mellitus	111	“1,2,4-Trihydroxyanthraquinone; 1,7-Dihydroxyxanthone; 3,5,6,7,8,3',4'-Heptamethoxyflavone; 3,5-Dihydroxy-7,4'-dimethoxyflavone; 3,7-Di-O-methylquercetin; 3'-Hydroxy-4'-O-methylglabridin; 3-Hydroxyurs-12-en-28-oic acid (Ursolic acid); 3'-Methoxydaidzein; 3'-Methoxypuerarin; 3-Methylkaempferol; 3'-O-methylorobol; 4,4'-Dihydroxy-2-methoxychalcone; Echinatin; 5,4'-Dihydroxy-3,7-dimethoxyflavone(Kuma…
45	Refractory Hematological Malignancies	111	“1,2,4-Trihydroxyanthraquinone; 1,7-Dihydroxyxanthone; 3,5,6,7,8,3',4'-Heptamethoxyflavone; 3,5-Dihydroxy-7,4'-dimethoxyflavone; 3,7-Di-O-methylquercetin; 3'-Hydroxy-4'-O-methylglabridin; 3'-Methoxydaidzein; 3-Methylkaempferol; 3'-O-methylorobol; 4,4'-Dihydroxy-2-methoxychalcone; Echinatin; 5,4'-Dihydroxy-3,7-dimethoxyflavone(Kumatakenin)*; 5,4'-Dihydroxy-7-methoxyflavanone (Sakuranetin); 5,7,2'-…
46	Obesity	105	“1,7-Dihydroxyxanthone; 3,5-Dihydroxy-7,4'-dimethoxyflavone; 3,7-Di-O-methylquercetin; 3'-Hydroxy-4'-O-methylglabridin; 3-Hydroxyurs-12-en-28-oic acid (Ursolic acid); 3'-Methoxydaidzein; 3'-Methoxypuerarin; 3-Methylkaempferol; 3'-O-methylorobol; 4,4'-Dihydroxy-2-methoxychalcone; Echinatin; 5,4'-Dihydroxy-3,7-dimethoxyflavone(Kumatakenin)*; 5,7,2'-Trihydroxy-8-methoxyflavone*; 5,7,4'-Trihydroxy-3'…
47	Thrombosis	90	“1,7-Dihydroxyxanthone; 3,5,6,7,8,3',4'-Heptamethoxyflavone; 3,5-Dihydroxy-7,4'-dimethoxyflavone; 3'-Hydroxy-4'-O-methylglabridin; 3'-Methoxydaidzein; 3-Methylkaempferol; 3'-O-methylorobol; 4,4'-Dihydroxy-2-methoxychalcone; Echinatin; 5,7,2'-Trihydroxy-8-methoxyflavone*; 5,7,4'-Trihydroxy-3'-methoxyisoflavone; 3'-O-Methylorobol; 5-Hydroxy-4',6,7-trimethoxyflavone (Salvigenin); 6''-O-Acetylglyciti…
48	Autoimmune Diseases	85	“1,7-Dihydroxyxanthone; 3,5-Dihydroxy-7,4'-dimethoxyflavone; 3,7-Di-O-methylquercetin; 3'-Hydroxy-4'-O-methylglabridin; 3'-Methoxydaidzein; 3-Methylkaempferol; 3'-O-methylorobol; 4,4'-Dihydroxy-2-methoxychalcone; Echinatin; 5,4'-Dihydroxy-3,7-dimethoxyflavone(Kumatakenin)*; 5,7,2'-Trihydroxy-8-methoxyflavone*; 5,7,4'-Trihydroxy-3'-methoxyisoflavone; 3'-O-Methylorobol; 5-Hydroxy-4',6,7-trimethoxyf…
49	Diabetes mellitus	85	“1,7-Dihydroxyxanthone; 3,5-Dihydroxy-7,4'-dimethoxyflavone; 3,7-Di-O-methylquercetin; 3'-Hydroxy-4'-O-methylglabridin; 3'-Methoxydaidzein; 3-Methylkaempferol; 3'-O-methylorobol; 4,4'-Dihydroxy-2-methoxychalcone; Echinatin; 5,4'-Dihydroxy-3,7-dimethoxyflavone(Kumatakenin)*; 5,7,2'-Trihydroxy-8-methoxyflavone*; 5,7,4'-Trihydroxy-3'-methoxyisoflavone; 3'-O-Methylorobol; 5-Hydroxy-4',6,7-trimethoxyf…
50	Asthma	84	“1,7-Dihydroxyxanthone; 3,5-Dihydroxy-7,4'-dimethoxyflavone; 3'-Hydroxy-4'-O-methylglabridin; 3-Hydroxyurs-12-en-28-oic acid (Ursolic acid); 3'-Methoxydaidzein; 3'-O-methylorobol; 4,4'-Dihydroxy-2-methoxychalcone; Echinatin; 5,4'-Dihydroxy-7-methoxyflavanone (Sakuranetin); 5,7,4'-Trihydroxy-3'-methoxyisoflavone; 3'-O-Methylorobol; 5-Hydroxy-4',6,7-trimethoxyflavone (Salvigenin); 8-Prenylkaempfero…
